# Supplementary material
Source: PubMed Central journal article supplement (PMC3777414)
Supplement: NIHMS73598-supplement-01.pdf [file NIHMS73598-supplement-01.pdf]

## Supplemental Data

### The EF-G-like GTPase Snu114p Regulates Spliceosome Dynamics Mediated

### by Brr2p, a DExD/H Box ATPase

Eliza C. Small, Stephanie R. Leggett, Adrienne A. Winans, and Jonathan P. Staley

#### Supplemental Experimental Procedures

**Strains and Plasmids.** (See Tables S1 and S2 below.) yJPS762 and yJPS1004 were made by TAP-tagging (Rigaut et al., 1999) *PRP43* or *PRP28*, respectively, through integrative transformation of BY4741 (Open Biosystems) with DNA amplified from pKG810 (Tasto et al., 2001) using primers Prp43-TAPF and Prp43-TAPR or Prp28-TAPF and Prp28-TAPR, respectively. The plasmid shuffle strains yJPS996, yJPS997 and yJPS998 were created by transforming yJPS762 with the wild-type, *URA3*-marked plasmids pSN123, pJPS1492 and pTB1, respectively, after which *BRR2* was replaced (Brachmann et al., 1998) with *LEU2* and *PRP22* and *SNU114* were replaced with *HIS3*, respectively. The plasmid shuffle strains yJPS1114 and yJPS1107 were created by transforming yJPS1004 with the wild-type, *URA3*-marked plasmid pSN123 and pTB1, respectively, after which *BRR2* was replaced with *LEU2* and *SNU114* was replaced with *HIS3*, respectively. The final, experimental strains were generated by first transforming yJPS996, yJPS997, yJPS998, yJPS1107, or yJPS1114 with plasmids encoding wild-type or mutant *BRR2*, *PRP22* or *SNU114* plasmids and then selecting against strains that maintained the corresponding *URA3*-marked plasmid by growth on 5-fluoroorotic acid (Boeke et al., 1984). pJPS1492, pJPS1518, and pJPS1521 were made by subcloning the inserts in p358-PRP22 and p358-G810A (Schwer and Meszaros, 2000) into the appropriate vector (see Table S2) by restriction enzyme digest using SacI and Sall. pJPS1346 and pJPS1347 were made by subcloning the inserts in pJPS298 and pJPS643 (Leeds et al., 2006) into pRS313 by restriction enzyme digest using SacI and XhoI. pJPS654 was made by introducing the point mutation into pPR130 by QuickChange mutagenesis (Stratagene).

**Oligonucleotides.** Oligonucleotides for snRNA primer extensions were previously described (Staley and Guthrie, 1999; Leeds et al., 2006). For detection of psoralen-crosslinked species by Northern analysis, templates for random-primed probes were generated for U2, U5 and U6 by PCR of genomic DNA using the following primers.

U2F, 5'ACGAATCTCTTTGCCCTTTTGGCTTAGATCA

U2R, 5'CGCGAGAATAACAACCTAAAGAAGCGAGCA

U5F, 5'AAGCAGCTTTACAGATCAATGGCGGAGGGA

U5R, 5'TTGAGAAAAAGGGCAGAAAAGTTCCAAAA

U6F, 5'GTTCGCGAAGTAACCCTTCGTGGACATTTGGTCAA

U6R, 5'AAAACGAAATAAATCTCTTTGTAAAACGGTTCATC

Oligonucleotides for Northern analysis for U3A precursors, intermediates and products were as follows.

U3A intron, 5'AGCTGCTGCAATGGTTG

U3A mRNA, 5'TTCCTATAGAAATGATCCTATGAAG

Oligonucleotides for Northern analysis of snRNAs were previously described (Noble and Guthrie, 1996).

Oligonucleotides for strain construction:

Prp43-TAPF,

5'TTGAAACAAGGTAAAAACAAAAAGAAGAGTAAGCACTCCAAGAAAATGAAGCGACGATGG  
AAAAAGAATTTC

Prp43-TAPR,

5'AAATTTATATAAATCTATTTTTTTTTTTTTTTTCGACACAAAATGTTACGACTCACTATAGGGA

Prp28-TAPF,

5'AACAAATATAACGTCGGCAAACAGCTCAGTAATGAGATTATATATATGAAGCGACGATGGA  
AAAAAGAATTTC

Prp28-TAPR,

5'TGAGATCTTGGGTCCATCAAAAAAAAAAGAAAGAAAATAATATAACTTACGACTCACTATAG

### Supplemental References

- Boeke, J.D., LaCroute, F., and Fink, G.R. (1984). A positive selection for mutants lacking orotidine-5'-phosphate decarboxylase activity in yeast: 5-fluoro-orotic acid resistance. *Mol. Gen. Genet.* *197*, 345-346.
- Brachmann, C.B., Davies, A., Cost, G.J., Caputo, E., Li, J., Hieter, P., and Boeke, J.D. (1998). Designer deletion strains derived from *Saccharomyces cerevisiae* S288C: a useful set of strains and plasmids for PCR-mediated gene disruption and other applications. *Yeast* *14*, 115-132.
- Brenner, T.J., and Guthrie, C. (2005). Genetic analysis reveals a role for the C-terminus of the *Saccharomyces cerevisiae* GTPase Snu114 during spliceosome activation. *Genetics* *170*, 1063-1080.
- Leeds, N.B., Small, E.C., Hiley, S.L., Hughes, T.R., and Staley, J.P. (2006). The splicing factor Prp43p, a DEAH box ATPase, functions in ribosome biogenesis. *Mol. Cell. Biol.* *26*, 513-522.
- Noble, S.M., and Guthrie, C. (1996). Transcriptional pulse-chase analysis reveals a role for a novel snRNP-associated protein in the manufacture of spliceosomal snRNPs. *EMBO J.* *15*, 4368-4379.
- Ragunathan, P.L., and Guthrie, C. (1998). RNA unwinding in U4/U6 snRNPs requires ATP hydrolysis and the DEIH-box splicing factor Brr2. *Curr. Biol.* *8*, 847-855.
- Rigaut, G., Shevchenko, A., Rutz, B., Wilm, M., Mann, M., and Séraphin, B. (1999). A generic protein purification method for protein complex characterization and proteome exploration. *Nat. Biotechnol.* *17*, 1030-1032.
- Schwer, B., and Meszaros, T. (2000). RNA helicase dynamics in pre-mRNA splicing. *EMBO J.* *19*, 6582-6591.

- Staley, J.P., and Guthrie, C. (1999). An RNA switch at the 5' splice site requires ATP and the DEAD box protein Prp28p. *Mol. Cell* 3, 55-64.
- Tasto, J.J., Carnahan, R.H., McDonald, W.H., and Gould, K.L. (2001). Vectors and gene targeting modules for tandem affinity purification in *Schizosaccharomyces pombe*. *Yeast* 18, 657-662.

Supplemental Tables

Table S1. Yeast Strains Used in this Study

| Strain   | Relevant Gene(s)                    | Genotype                                                                         | Source/Reference     |
|----------|-------------------------------------|----------------------------------------------------------------------------------|----------------------|
| yJPS797  | PRP43-TAP-KanMX                     | <i>MATa his3Δ leu2Δ met15Δ ura3Δ prp43::HIS3 pJPS1162</i>                        | Leeds et al., 2006   |
| yJPS773  | PRP22-TAP-KanMX                     | <i>MATa his3Δ leu2Δ met15Δ ura3Δ</i>                                             | Leeds et al., 2006   |
| yJPS798  | <i>prp43-Q423N-TAP-KanMX</i>        | <i>MATa his3Δ leu2Δ met15Δ ura3Δ prp43::HIS3 pJPS1163</i>                        | Leeds et al., 2006   |
| yJPS762  | PRP43-TAP-KanMX                     | <i>MATa his3Δ leu2Δ met15Δ ura3Δ</i>                                             | This study           |
| yJPS997  | PRP43-TAP-KanMX PRP22               | <i>MATa his3Δ leu2Δ met15Δ ura3Δ prp22::HIS3 pJPS1492</i>                        | This study           |
| yJPS1049 | PRP43-TAP-KanMX PRP22               | <i>MATa his3Δ leu2Δ met15Δ ura3Δ prp22::HIS3 pJPS1518</i>                        | This study           |
| yJPS1052 | PRP43-TAP-KanMX <i>prp22-G810A</i>  | <i>MATa his3Δ leu2Δ met15Δ ura3Δ prp22::HIS3 pJPS1521</i>                        | This study           |
| yJPS996  | PRP43-TAP-KanMX BRR2                | <i>MATa his3Δ leu2Δ met15Δ ura3Δ brr2::LEU2 pSN123</i>                           | This study           |
| yJPS999  | PRP43-TAP-KanMX BRR2                | <i>MATa his3Δ leu2Δ met15Δ ura3Δ brr2::LEU2 pPR130</i>                           | This study           |
| yJPS1000 | PRP43-TAP-KanMX <i>brr2-1</i>       | <i>MATa his3Δ leu2Δ met15Δ ura3Δ brr2::LEU2 pPR133</i>                           | This study           |
| yJPS1001 | PRP43-TAP-KanMX <i>brr2-RI107A</i>  | <i>MATa his3Δ leu2Δ met15Δ ura3Δ brr2::LEU2 pJPS654</i>                          | This study           |
| yTB135   | PRP43 SNU114                        | <i>MATa his3Δ leu2Δ ura3Δ trp1Δ lys2Δ prp43::KanMX snu114::KanMX pTB1 pTB123</i> | Brenner et al., 2005 |
| yJPS998  | PRP43-TAP-KanMX SNU114              | <i>MATa his3Δ leu2Δ met15Δ ura3Δ snu114::HIS3 pTB1</i>                           | This study           |
| yJPS1053 | PRP43-TAP-KanMX SNU114              | <i>MATa his3Δ leu2Δ met15Δ ura3Δ snu114::HIS3 pTB106</i>                         | This study           |
| yJPS1120 | PRP43-TAP-KanMX <i>snu114-14</i>    | <i>MATa his3Δ leu2Δ met15Δ ura3Δ snu114::HIS3 pTB108</i>                         | This study           |
| yJPS1056 | PRP43-TAP-KanMX <i>snu114-60</i>    | <i>MATa his3Δ leu2Δ met15Δ ura3Δ snu114::HIS3 pTB113</i>                         | This study           |
| yJPS1054 | PRP43-TAP-KanMX <i>snu114-D271N</i> | <i>MATa his3Δ leu2Δ met15Δ ura3Δ snu114::HIS3 pTB114</i>                         | This study           |
| yJPS1004 | PRP28-TAP-KanMX                     | <i>MATa his3Δ leu2Δ met15Δ ura3Δ</i>                                             | This study           |
| yJPS1107 | PRP28-TAP-KanMX SNU114              | <i>MATa his3Δ leu2Δ met15Δ ura3Δ snu114::HIS3 pTB1</i>                           | This study           |
| yJPS1108 | PRP28-TAP-KanMX SNU114              | <i>MATa his3Δ leu2Δ met15Δ ura3Δ snu114::HIS3 pTB106</i>                         | This study           |
| yJPS1111 | PRP28-TAP-KanMX <i>snu114-D271N</i> | <i>MATa his3Δ leu2Δ met15Δ ura3Δ snu114::HIS3 pTB114</i>                         | This study           |
| yJPS1114 | PRP28-TAP-KanMX BRR2                | <i>MATa his3Δ leu2Δ met15Δ ura3Δ brr2::LEU2 pSN123</i>                           | This study           |
| yJPS1115 | PRP28-TAP-KanMX BRR2                | <i>MATa his3Δ leu2Δ met15Δ ura3Δ brr2::LEU2 pPR130</i>                           | This study           |
| yJPS1117 | PRP28-TAP-KanMX <i>brr2-RI107A</i>  | <i>MATa his3Δ leu2Δ met15Δ ura3Δ brr2::LEU2 pJPS654</i>                          | This study           |

**Table S2. Plasmids Used in this Study**

| <b>Plasmid</b> | <b>Genotype</b>        | <b>Vector Backbone</b> | <b>Source or Reference</b>     |
|----------------|------------------------|------------------------|--------------------------------|
| pJPS1162       | <i>PRP43-TAP</i>       | pRS316                 | (Leeds et al., 2006)           |
| pJPS1163       | <i>prp43-Q423N-TAP</i> | pRS316                 | (Leeds et al., 2006)           |
| pJPS1492       | <i>PRP22</i>           | pRS316                 | This lab                       |
| pJPS1518       | <i>PRP22</i>           | pRS315                 | This lab                       |
| pJPS1521       | <i>prp22-G810A</i>     | pRS315                 | This lab                       |
| pSN123         | <i>BRR2</i>            | pRS426                 | (Ragunathan and Guthrie, 1998) |
| pPR130         | <i>BRR2</i>            | pSE362                 | (Ragunathan and Guthrie, 1998) |
| pPR133         | <i>brr2-1</i>          | pSE362                 | (Ragunathan and Guthrie, 1998) |
| pJPS654        | <i>brr2-R1107A</i>     | pSE362                 | This study                     |
| pJPS298        | <i>PRP43</i>           | pRS315                 | (Leeds et al., 2006)           |
| pJPS643        | <i>prp43-Q423N</i>     | pRS315                 | (Leeds et al., 2006)           |
| pJPS1346       | <i>PRP43</i>           | pRS313                 | This lab                       |
| pJPS1347       | <i>prp43-Q423N</i>     | pRS313                 | This lab                       |
| pTB123         | <i>PRP43</i>           | pSE360                 | (Brenner and Guthrie, 2005)    |
| pTB1           | <i>SNU114</i>          | pRS316                 | (Brenner and Guthrie, 2005)    |
| pTB106         | <i>SNU114</i>          | pRS315                 | C. Guthrie                     |
| pTB108         | <i>snu114-14</i>       | pRS315                 | C. Guthrie                     |
| pTB113         | <i>snu114-60</i>       | pRS315                 | C. Guthrie                     |
| pTB114         | <i>snu114-D271N</i>    | pRS315                 | C. Guthrie                     |
